# Supplementary material for: Freely accessible ready to use global infrastructure for SARS-CoV-2 monitoring
Source: PubMed Central journal article supplement (PMC8010728; doi:10.1101/2021.03.25.437046), 2021-03-25

**Table S1.** Parameters used for comparing performance of allelic-variant callers

| <b>Caller</b> | <b>Command line</b>                                                                                                 | <b>Figure 2 label</b> |
|---------------|---------------------------------------------------------------------------------------------------------------------|-----------------------|
| mutect2       | --mitochondria-mode true                                                                                            | m                     |
| mutect2       | default                                                                                                             | m_noM                 |
| mutect2       | --mitochondria-mode true<br>--flr2-max-depth 1000000                                                                | m_md_inf              |
| mutect2       | --mitochondria-mode true<br>--flr2-max-depth 1000000<br>-max-af 1                                                   | m_md_inf_max_af1      |
| freebayes     | --haplotype-length 0<br>--min-alternate-fraction 0.001<br>--min-alternate-count 1<br>--pooled-continuous --ploidy 1 | hl-0_maf-001_pc       |
| freebayes     | -min-alternate-fraction 0.001<br>--pooled-continuous --ploidy 1                                                     | maf-001_pc            |
| lofreq        | --no-default-filter                                                                                                 | nf                    |
| lofreq        | default                                                                                                             | def                   |

**Table S2.** Links to Galaxy histories containing COG-UK reanalysis results. A continuously updated list can be accessed <https://github.com/galaxyproject/SARS-CoV-2/tree/master/data/cog-uk-tracking>. These datasets will also be available from the Viral Beacon project at (<https://covid19beacon.org.eu/>).

| Galaxy histories  | contained ENA IDs     | AV history (with VCF of all called variants)                                                                                  | variant report history (with tabular reports of all variants)                                                                 |
|-------------------|-----------------------|-------------------------------------------------------------------------------------------------------------------------------|-------------------------------------------------------------------------------------------------------------------------------|
| COG-UK NT1659949O | ERR5379175-ERR5379540 | <a href="https://usegalaxy.eu/histories/view?id=a70e27d468a29519">https://usegalaxy.eu/histories/view?id=a70e27d468a29519</a> | -                                                                                                                             |
| COG-UK NT1659948N | ERR5378946-ERR5379174 | <a href="https://usegalaxy.eu/histories/view?id=d67968ed5fe74586">https://usegalaxy.eu/histories/view?id=d67968ed5fe74586</a> | <a href="https://usegalaxy.eu/histories/view?id=762cd32fdd59b3ef">https://usegalaxy.eu/histories/view?id=762cd32fdd59b3ef</a> |
| COG-UK NT1659945K | ERR5352103-ERR5352455 | <a href="https://usegalaxy.eu/histories/view?id=97050f0c7217eb53">https://usegalaxy.eu/histories/view?id=97050f0c7217eb53</a> | <a href="https://usegalaxy.eu/histories/view?id=1bf724bcb1a6bce2">https://usegalaxy.eu/histories/view?id=1bf724bcb1a6bce2</a> |
| COG-UK NT1659944J | ERR5351745-ERR5352102 | <a href="https://usegalaxy.eu/histories/view?id=c5156eda4b3c5e24">https://usegalaxy.eu/histories/view?id=c5156eda4b3c5e24</a> | <a href="https://usegalaxy.eu/histories/view?id=55823ef9c77a410d">https://usegalaxy.eu/histories/view?id=55823ef9c77a410d</a> |
| COG-UK NT1659891N | ERR5378314-ERR5378575 | <a href="https://usegalaxy.eu/histories/view?id=c25d0f298ac2ef34">https://usegalaxy.eu/histories/view?id=c25d0f298ac2ef34</a> | <a href="https://usegalaxy.eu/histories/view?id=d30fa7c11c245bd7">https://usegalaxy.eu/histories/view?id=d30fa7c11c245bd7</a> |
| COG-UK NT1659885P | ERR5352718-ERR5375533 | <a href="https://usegalaxy.eu/histories/view?id=8f829af16c834443">https://usegalaxy.eu/histories/view?id=8f829af16c834443</a> | <a href="https://usegalaxy.eu/histories/view?id=df02b799e2c42a7c">https://usegalaxy.eu/histories/view?id=df02b799e2c42a7c</a> |
| COG-UK NT1660206U | ERR5382276-ERR5382582 | <a href="https://usegalaxy.eu/histories/view?id=484f288640bdbbc4">https://usegalaxy.eu/histories/view?id=484f288640bdbbc4</a> | <a href="https://usegalaxy.eu/histories/view?id=612b0916712b673a">https://usegalaxy.eu/histories/view?id=612b0916712b673a</a> |
| COG-UK NT1660207V | ERR5382583-ERR5382926 | <a href="https://usegalaxy.eu/histories/view?id=23191ca01f1766fd">https://usegalaxy.eu/histories/view?id=23191ca01f1766fd</a> | <a href="https://usegalaxy.eu/histories/view?id=1c870e4766af57fa">https://usegalaxy.eu/histories/view?id=1c870e4766af57fa</a> |
| COG-UK NT1660170C | ERR5379541-ERR5379801 | <a href="https://usegalaxy.eu/histories/view?id=216df75b20548363">https://usegalaxy.eu/histories/view?id=216df75b20548363</a> | <a href="https://usegalaxy.eu/histories/view?id=996170468f48ad5e">https://usegalaxy.eu/histories/view?id=996170468f48ad5e</a> |
| COG-UK NT1660168I | ERR5380719-ERR5381079 | <a href="https://usegalaxy.eu/histories/view?id=929888a678e25678">https://usegalaxy.eu/histories/view?id=929888a678e25678</a> | <a href="https://usegalaxy.eu/histories/view?id=a5371f3d76143ee6">https://usegalaxy.eu/histories/view?id=a5371f3d76143ee6</a> |
| COG-UK NT1660200O | ERR5380509-ERR5380718 | <a href="https://usegalaxy.eu/histories/view?id=5d19cd66540f3b4f">https://usegalaxy.eu/histories/view?id=5d19cd66540f3b4f</a> | <a href="https://usegalaxy.eu/histories/view?id=2d5595a60fe335b8">https://usegalaxy.eu/histories/view?id=2d5595a60fe335b8</a> |
| COG-UK NT1660185J | ERR5381350-ERR5381634 | <a href="https://usegalaxy.eu/histories/view?id=761b945d604a584c">https://usegalaxy.eu/histories/view?id=761b945d604a584c</a> | <a href="https://usegalaxy.eu/histories/view?id=0bb2222cb26f62fb">https://usegalaxy.eu/histories/view?id=0bb2222cb26f62fb</a> |
| COG-UK NT1660171D | ERR5379802-ERR5380132 | <a href="https://usegalaxy.eu/histories/view?id=ee5d68ddc0c16766">https://usegalaxy.eu/histories/view?id=ee5d68ddc0c16766</a> | <a href="https://usegalaxy.eu/histories/view?id=b7435d647332c545">https://usegalaxy.eu/histories/view?id=b7435d647332c545</a> |

|                   |                       |                                                                                                                               |                                                                                                                               |
|-------------------|-----------------------|-------------------------------------------------------------------------------------------------------------------------------|-------------------------------------------------------------------------------------------------------------------------------|
| COG-UK NT1660086H | ERR5378576-ERR5378945 | <a href="https://usegalaxy.eu/histories/view?id=bdfae26e713d1461">https://usegalaxy.eu/histories/view?id=bdfae26e713d1461</a> | <a href="https://usegalaxy.eu/histories/view?id=7586ad8f459dfbdc">https://usegalaxy.eu/histories/view?id=7586ad8f459dfbdc</a> |
| COG-UK NT1660169J | ERR5381080-ERR5381349 | <a href="https://usegalaxy.eu/histories/view?id=02dd0e471db55821">https://usegalaxy.eu/histories/view?id=02dd0e471db55821</a> | <a href="https://usegalaxy.eu/histories/view?id=22410c20518125b3">https://usegalaxy.eu/histories/view?id=22410c20518125b3</a> |
| COG-UK NT1660201P | ERR5380133-ERR5380314 | <a href="https://usegalaxy.eu/histories/view?id=f584aa738ccbde76">https://usegalaxy.eu/histories/view?id=f584aa738ccbde76</a> | -                                                                                                                             |
| COG-UK NT1660199P | ERR5381954-ERR5382275 | <a href="https://usegalaxy.eu/histories/view?id=ee1e4a8c859879dd">https://usegalaxy.eu/histories/view?id=ee1e4a8c859879dd</a> | -                                                                                                                             |
| COG-UK NT1660186K | ERR5381635-ERR5381953 | <a href="https://usegalaxy.eu/histories/view?id=9dab59078524857b">https://usegalaxy.eu/histories/view?id=9dab59078524857b</a> | -                                                                                                                             |

---

**Figure S1.** Observed (red) versus predicted (orange) counts of samples sharing  $N=0, 1, 2, \dots$  variants as a function of allelic-variant number for each dataset. The intersection of the lines gives the cutoff that was applied to each dataset.

“Boston” ([https://covid19.galaxyproject.org/genomics/interactive\\_images/thresholding\\_Boston.html](https://covid19.galaxyproject.org/genomics/interactive_images/thresholding_Boston.html))

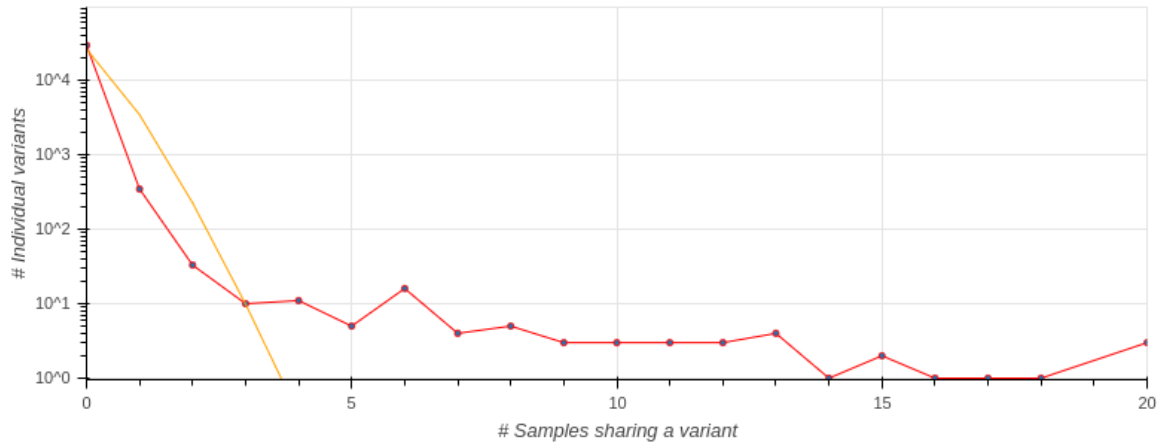

“COG-Pre” ([https://covid19.galaxyproject.org/genomics/interactive\\_images/thresholding\\_COG-Pre.html](https://covid19.galaxyproject.org/genomics/interactive_images/thresholding_COG-Pre.html))

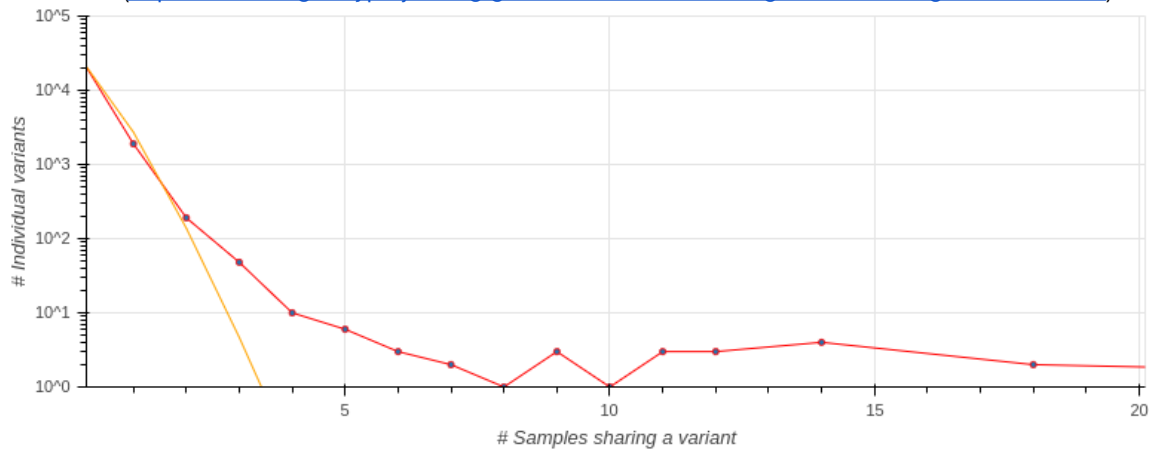

“COG-Post” ([https://covid19.galaxyproject.org/genomics/interactive\\_images/thresholding\\_COG-Post.html](https://covid19.galaxyproject.org/genomics/interactive_images/thresholding_COG-Post.html))

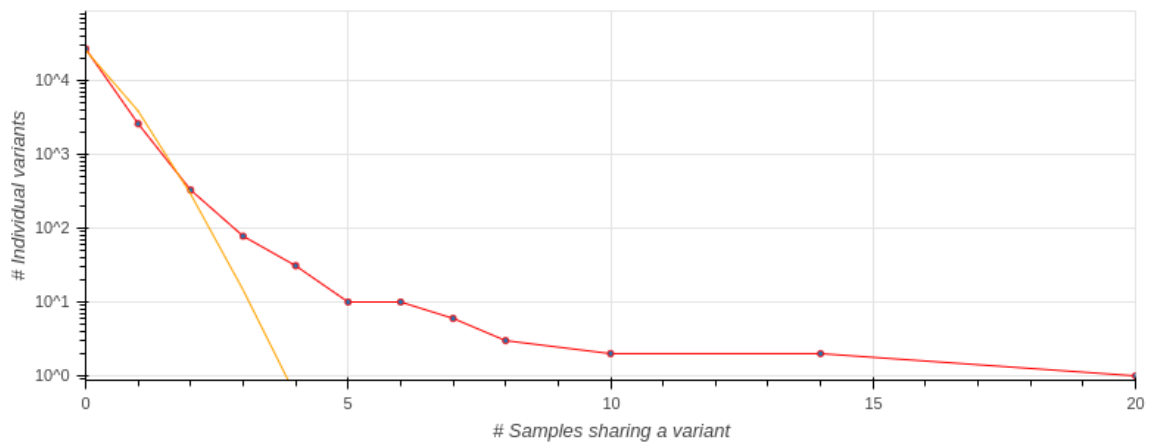

**Figure S2.** Distribution of allele frequencies for different types of substitutions.

“Boston” ([https://covid19.galaxyproject.org/genomics/interactive\\_images/af\\_histogram\\_Boston.html](https://covid19.galaxyproject.org/genomics/interactive_images/af_histogram_Boston.html))

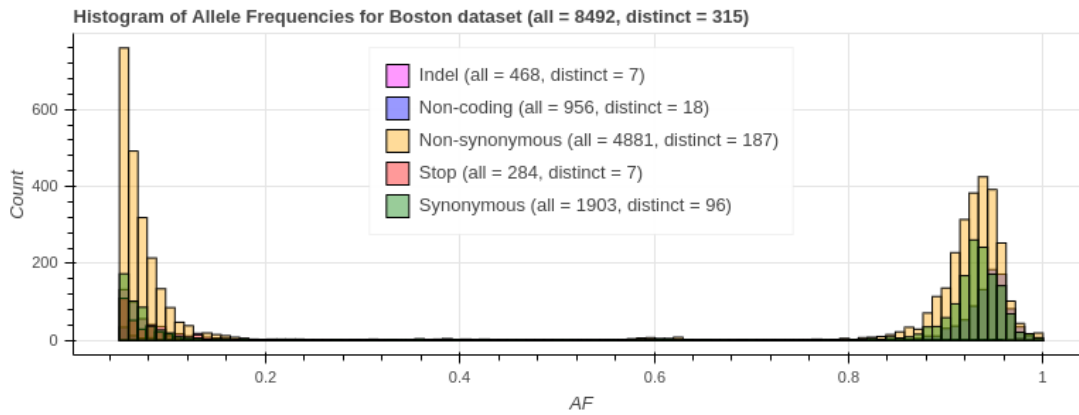

“COG-Pre” ([https://covid19.galaxyproject.org/genomics/interactive\\_images/af\\_histogram\\_COG-Pre.html](https://covid19.galaxyproject.org/genomics/interactive_images/af_histogram_COG-Pre.html))

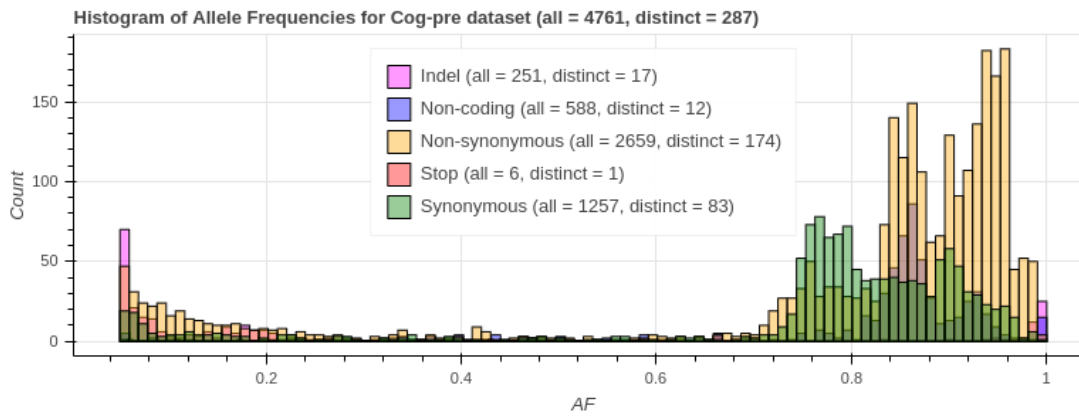

“COG-Post” ([https://covid19.galaxyproject.org/genomics/interactive\\_images/af\\_histogram\\_COG-Post.html](https://covid19.galaxyproject.org/genomics/interactive_images/af_histogram_COG-Post.html))

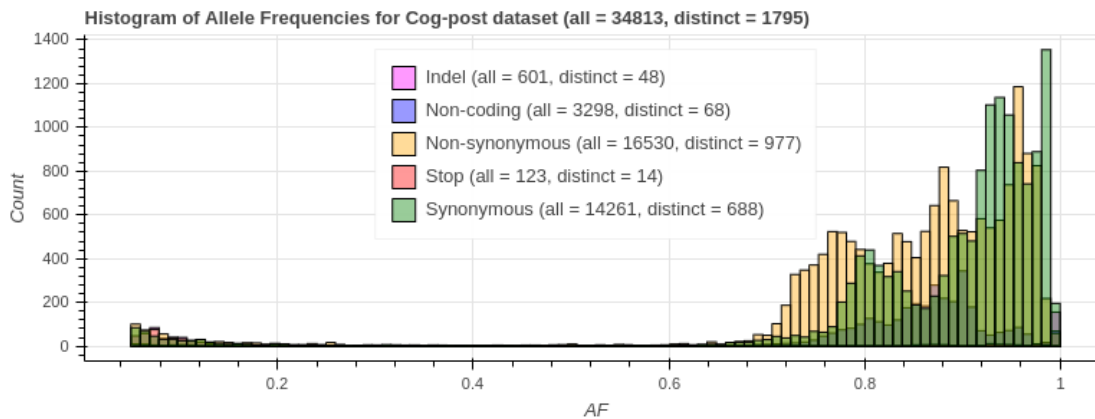

**Figure S3.** Types and counts of single nucleotide substitutions.

“Boston” ([https://covid19.galaxyproject.org/genomics/interactive\\_images/substitutions\\_types\\_Boston.html](https://covid19.galaxyproject.org/genomics/interactive_images/substitutions_types_Boston.html))

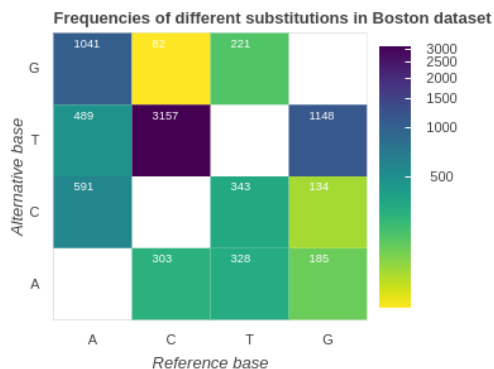

“COG-Pre” ([https://covid19.galaxyproject.org/genomics/interactive\\_images/substitutions\\_types\\_COG-Pre.html](https://covid19.galaxyproject.org/genomics/interactive_images/substitutions_types_COG-Pre.html))

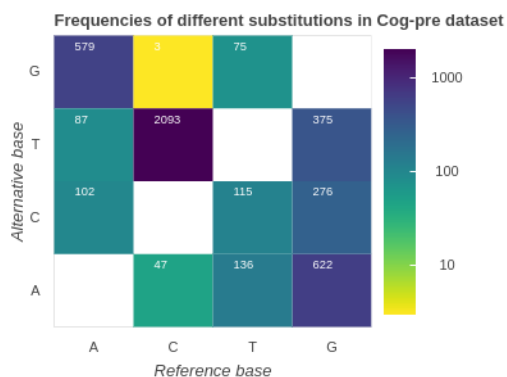

“COG-Post” ([https://covid19.galaxyproject.org/genomics/interactive\\_images/substitutions\\_types\\_COG-Post.html](https://covid19.galaxyproject.org/genomics/interactive_images/substitutions_types_COG-Post.html))

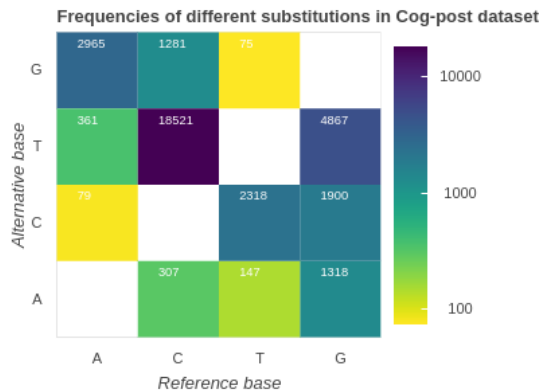

**Figure S4.** Relationship between population frequency and alternative allele frequency in the three datasets. CoV = coefficient of variation. PF = population frequency (e.g., how many samples in the dataset share a given variant). Points with high CoV have large spread of allele frequencies.

“Boston”

[https://covid19.galaxyproject.org/genomics/interactive\\_images/cov\\_vs\\_pf\\_boston.html](https://covid19.galaxyproject.org/genomics/interactive_images/cov_vs_pf_boston.html)

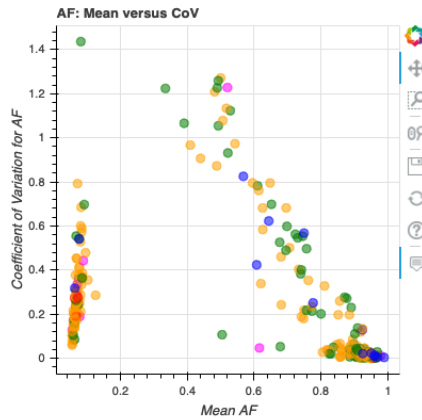

“COG-Pre”

[https://covid19.galaxyproject.org/genomics/interactive\\_images/cov\\_vs\\_pf\\_co-g-pre.html](https://covid19.galaxyproject.org/genomics/interactive_images/cov_vs_pf_co-g-pre.html)

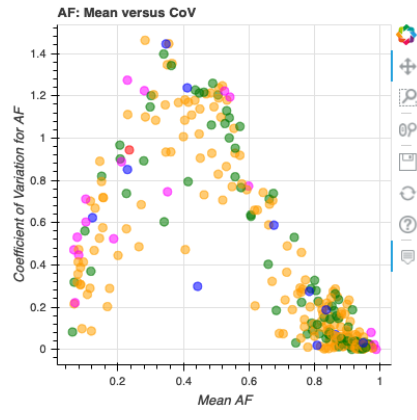

“COG-Post”

[https://covid19.galaxyproject.org/genomics/interactive\\_images/cov\\_vs\\_pf\\_co-g-post.html](https://covid19.galaxyproject.org/genomics/interactive_images/cov_vs_pf_co-g-post.html)

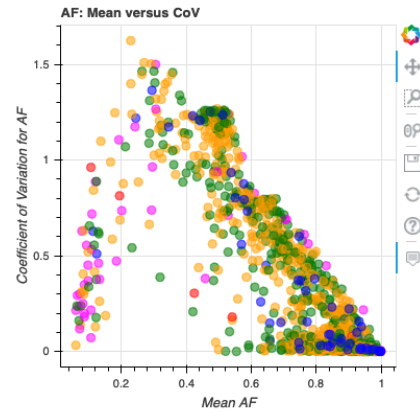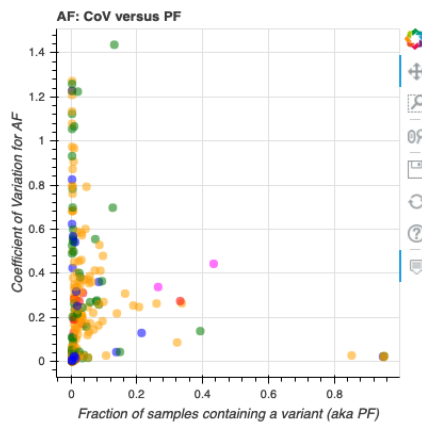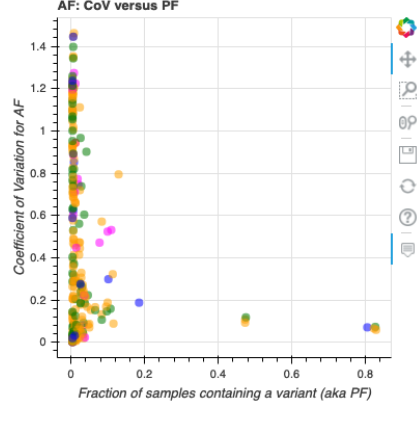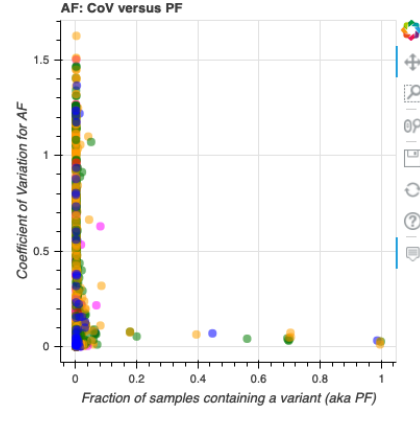

**Figure S5.** Distribution of allelic variants across the genome. Height of each bar is proportional to the coefficient of variation for alternative allele frequency.

“Boston” ([https://covid19.galaxyproject.org/genomics/interactive\\_images/genomic\\_dist\\_boston.html](https://covid19.galaxyproject.org/genomics/interactive_images/genomic_dist_boston.html))

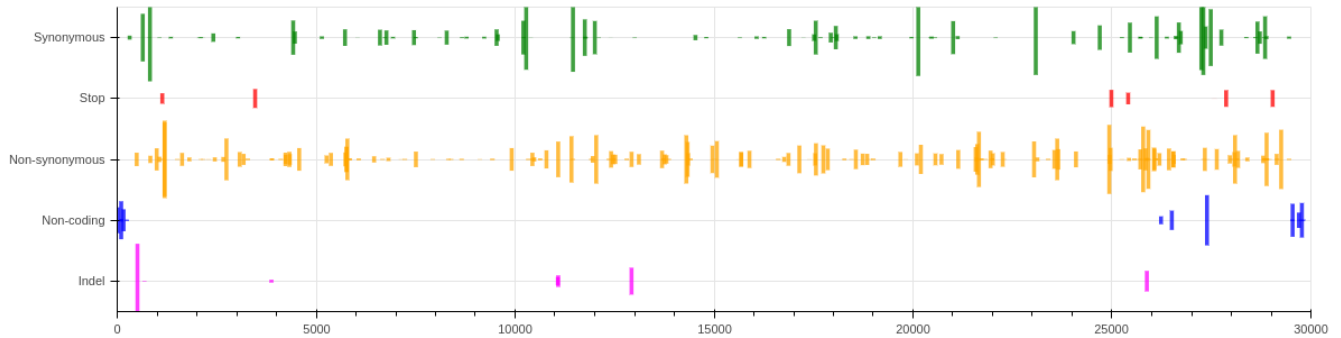

“COG-Pre” ([https://covid19.galaxyproject.org/genomics/interactive\\_images/genomic\\_dist\\_cog-pre.html](https://covid19.galaxyproject.org/genomics/interactive_images/genomic_dist_cog-pre.html))

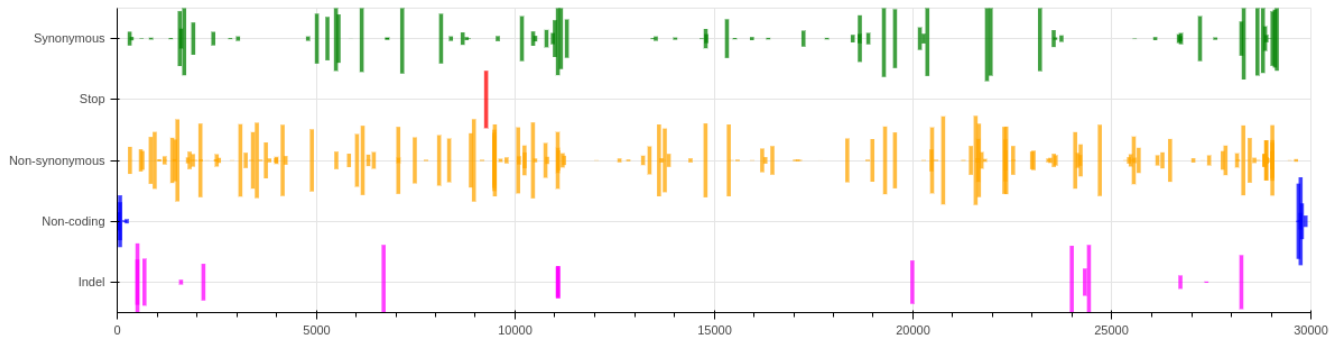

“COG-Post” ([https://covid19.galaxyproject.org/genomics/interactive\\_images/genomic\\_dist\\_cog-post.html](https://covid19.galaxyproject.org/genomics/interactive_images/genomic_dist_cog-post.html))

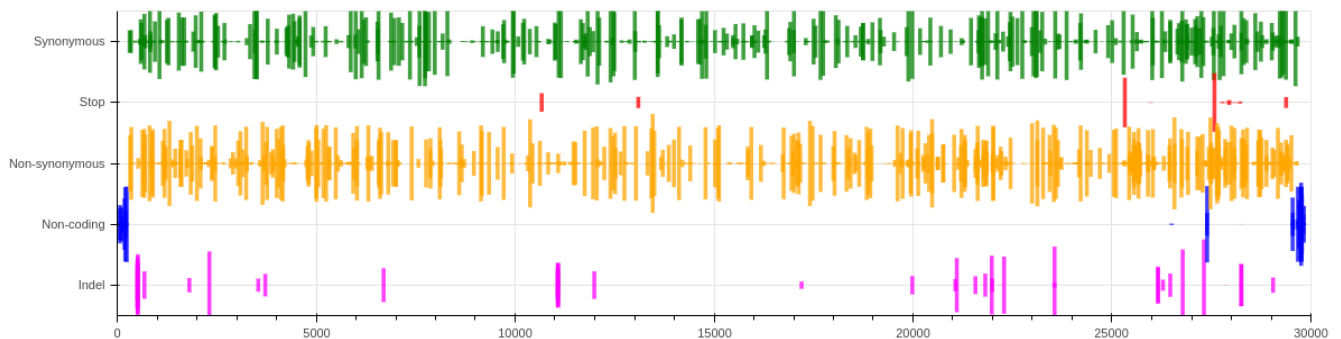



**Figure S6.** Allelic variant counts per gene.

“Boston” ([https://covid19.galaxyproject.org/genomics/interactive\\_images/gene\\_dist\\_boston.html](https://covid19.galaxyproject.org/genomics/interactive_images/gene_dist_boston.html))

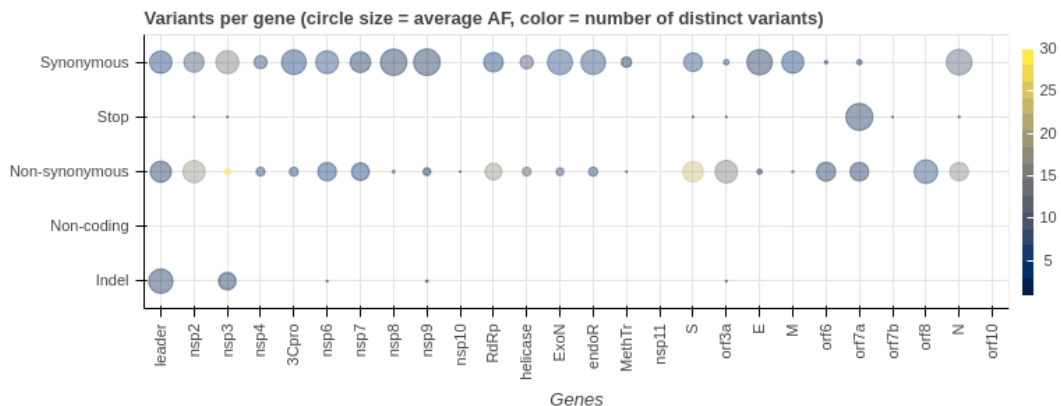

“COG-Pre” ([https://covid19.galaxyproject.org/genomics/interactive\\_images/gene\\_dist\\_cog-pre.html](https://covid19.galaxyproject.org/genomics/interactive_images/gene_dist_cog-pre.html))

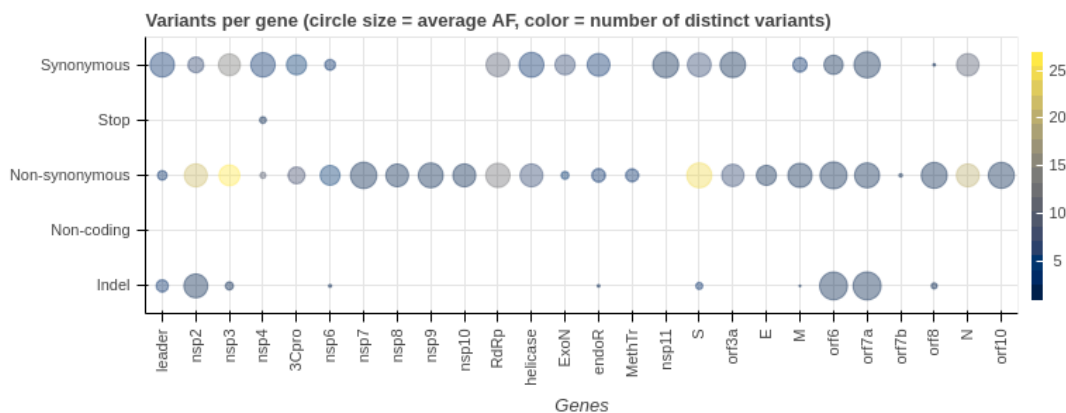

“COG-Post” ([https://covid19.galaxyproject.org/genomics/interactive\\_images/gene\\_dist\\_cog-post.html](https://covid19.galaxyproject.org/genomics/interactive_images/gene_dist_cog-post.html))

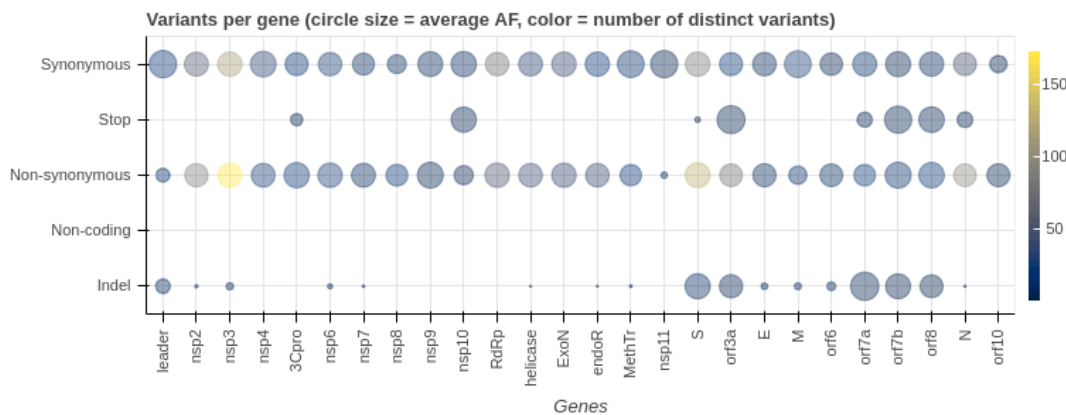

**Figure S7.** Counts of alternative bases at eight variable locations within pBR322.

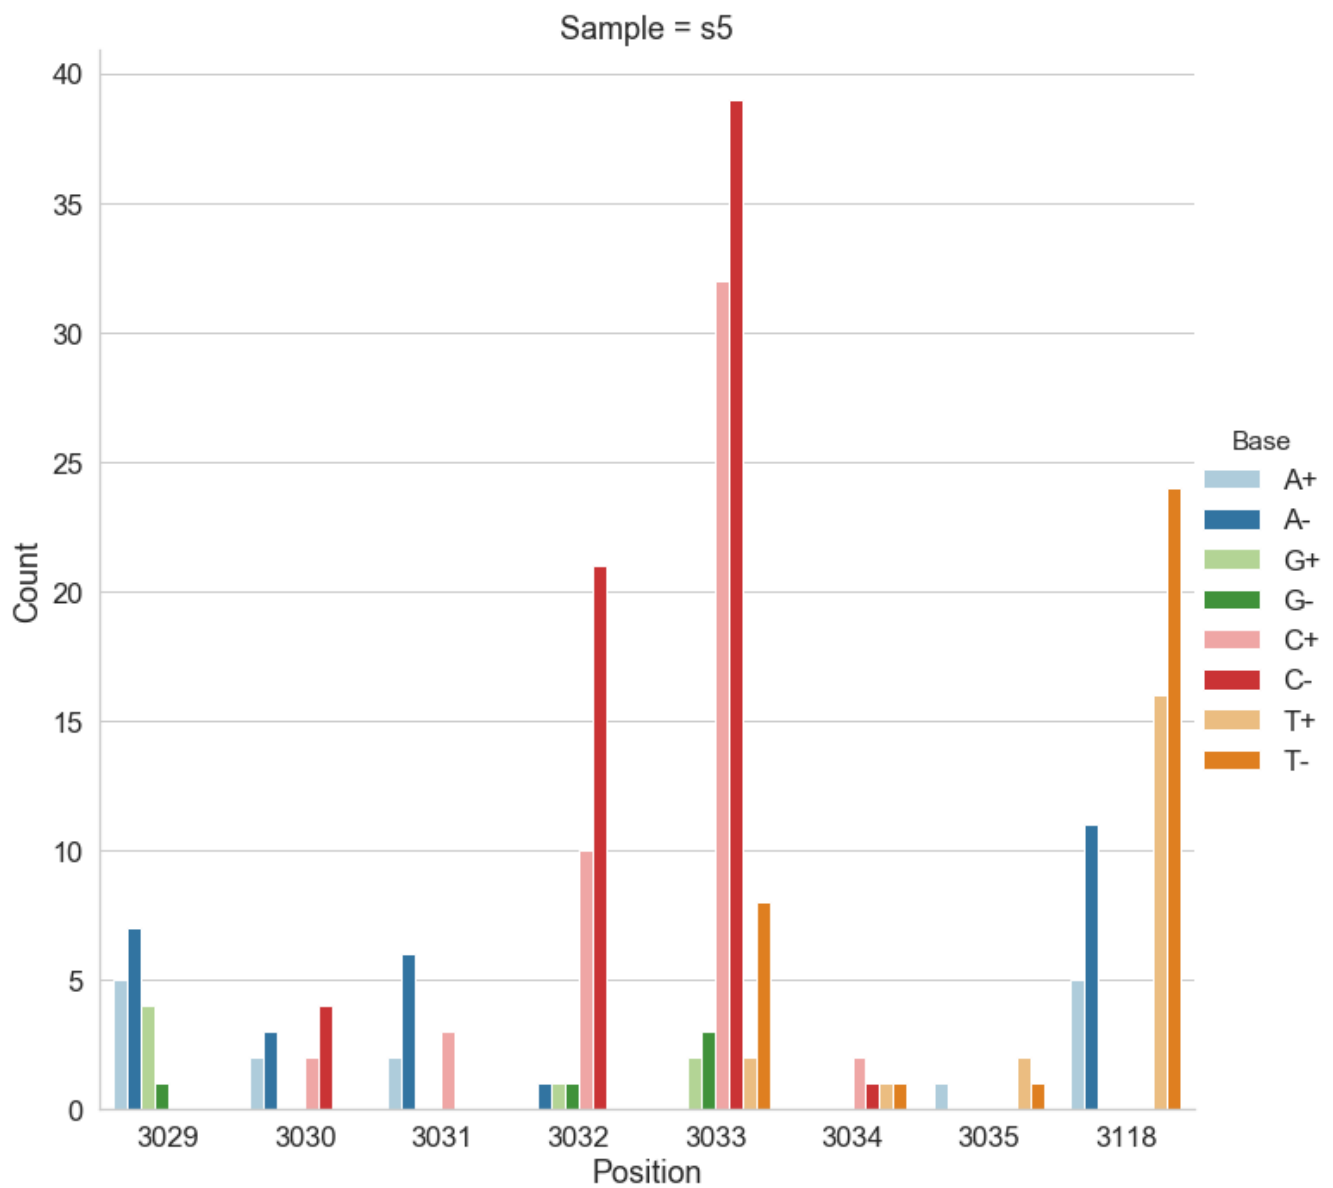

**Figure S8.** Calls made by mutect2, freebayes, and lofreq. For explanation of x-axis labels see Table S1.

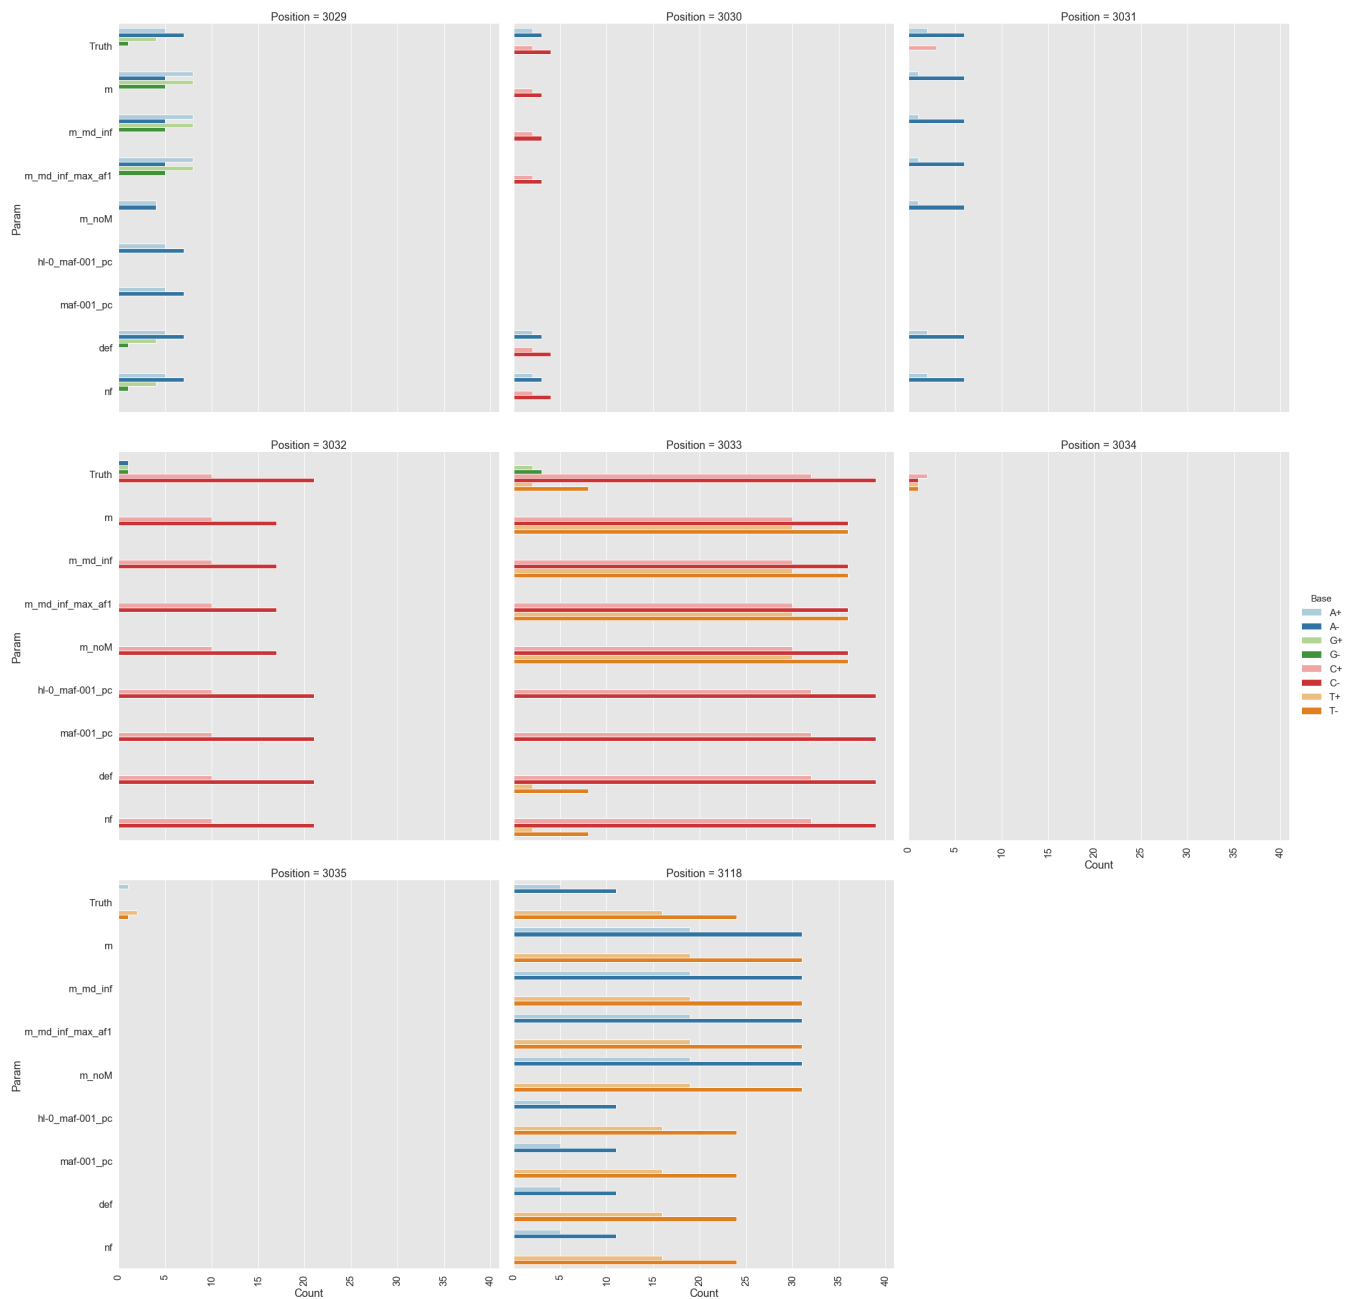

Supplement: NIHPP2021.03.25.437046-supplement-1.pdf [file NIHPP2021.03.25.437046-supplement-1.pdf]
